# Supplementary material for: High Expression of FAP in Colorectal Cancer Is Associated With Angiogenesis and Immunoregulation Processes
Source: Front Oncol. 2020 Jul 8;10:979. doi: 10.3389/fonc.2020.00979 (PMC7362758; doi:10.3389/fonc.2020.00979)
Supplement: Supplementary Table 2 — Univariate and multivariate Cox regression analyses for the effect of FAP mRNA expression and clinicopathological parameters on overall survival in the TCGA cohort. [file Table_2.XLSX]

## Sheet: Sheet1
Variables		Overall Survival
		Univariate Analysis	Multivariate Analysis
		P-value	P-value	HR (95% CI)
FAP Expression		0.06
High
Low
Gender		0.83
Female
Male
AJCC Stages		< 0.001	< 0.001	3.5 (2.30- 5.24)
III + IV
I + II
Microsatellite Instability		1
Yes
No
CRC Subtypes		0.65
CMS4
CMS3
CMS2
CMS1
Anatomic Neoplasm Subdivision		0.02	0.01	0.9 (0.83 - 0.96)
Cecum
Ascending Colon
Descending Colon
Transverse Colon
Sigmoid Colon
Hepatic Flexure
Splenic Flexure
Rectosigmoid Junction
Rectum
